# Supplementary material for: Smoking-Attributable Health Care Expenditures for US Adults With Chronic Lower Respiratory Disease
Source: PubMed Central journal article supplement (PMC11140527; doi:10.1001/jamanetworkopen.2024.13869), 2024-05-30
Supplement: jamanetwopen-e2413869-s001.pdf [file jamanetwopen-e2413869-s001.pdf]

## Supplemental Online Content

Gu D, Sung H-Y, Calfee CS, Wang Y, Yao T, Max W. Smoking-attributable health care expenditures for US adults with chronic lower respiratory disease. *JAMA Netw Open*. 2024;7(5):e2413869. doi:10.1001/jamanetworkopen.2024.13869

**eMethods.** Supplemental Methods

### **eReferences**

**eTable 1.** Number and Percentage of US Adults (Aged 35+ Years) Identified to Have Chronic Lower Respiratory Disease (CLRD) in 2020 and Their Health Care Expenditures in 2020 by Type of Services and Age Group

**eTable 2.** Estimated Coefficients of the Econometric Models for the Impact of Cigarette Smoking on Health Care Utilization Among US Adults Aged 35+ Years With Chronic Lower Respiratory Disease: National Health Interview Survey, 2014-2018

**eTable 3.** Number of Smokers Among US Adults (Aged 35+ Years) With Chronic Lower Respiratory Disease (CLRD) in 2020 by Age Group

**eTable 4.** Sensitivity Analysis Which Allows for the Negative SAF Values: Annual Cigarette Smoking-Attributable Health Care Expenditures (SAHEs) in 2020 by Type of Health Services, Smoking Status, and Age Group for US Adults Aged 35+ Years With Chronic Lower Respiratory Disease (CLRD)

This supplemental material has been provided by the authors to give readers additional information about their work.

**eMethods.** Supplemental Methods

**Specification and Estimation Method for the Econometric Models for Cigarette Smoking-**

**Attributable Healthcare Utilization** Adapting the models that Max and colleagues have developed and refined over the past 3 decades,<sup>1-5</sup> we analyzed the association between cigarette smoking and healthcare utilization among persons with chronic lower respiratory disease (CLRD) using a 9-equation econometric model. Each equation or group of equations is described below in terms of the dependent variable, independent variables, and functional form.

**Equation 1:** *Propensity of Having Poor Health Status*<sup>a</sup> =  $f_1$  (smoking status<sup>b</sup>, X)

**Equations 2-5:** *Propensity of Having Positive Utilization for each of four types of healthcare*

*utilization*<sup>c</sup> =  $f_2$  (smoking status<sup>b</sup>, X, Y, predicted propensity of having poor health status from Equation 1)

**Equations 6-9:** *Natural Logarithm of Utilization Level among adults with Positive Utilization for*

*each of four types of healthcare utilization*<sup>c</sup> =  $f_3$  (smoking status<sup>b</sup>, X, Y, predicted propensity of having poor health status from Equation 1)

where:

X = covariates (including gender, age, race/ethnicity, educational level, marital status, region of residence, body weight status, and binge drinking status);

Y = covariates (including X, and poverty status and health insurance coverage);

$f_1$  = ordered probit function;

$f_2$  = probit function;

$f_3$  = log-linear least squares;

<sup>a</sup>Self-reported health status is measured as an ordinal variable ranging from 0 (excellent), 1 (very good), 2 (good), 3 (fair), to 4 (poor);

<sup>b</sup>Smoking status is categorized into four groups: current smokers, former smokers who quit <15 years ago (i.e., ‘shorter-term quitters’), former smokers who quit 15+ years ago (i.e., ‘long-term quitters’), and never smokers (reference group);

<sup>c</sup>Four types of healthcare utilization include inpatient care measured by the number of hospital nights in the past 12 months, the number of ED visits in the past 12 months, the number of physician visits in the past 2 weeks, and the number of home health visits in the past 2 weeks.

Equation 1 was estimated as a an ordered probit model, Equations 2-5 were estimated as a probit model, and Equations 6-9 were equation were estimated by ordinary least squares. The statistical significance for the estimated coefficient was determined by chi-square test for the ordered Probit model in Equation 1 and the Probit models in Equations 2-5, and t-test for the log-linear model in Equations 5-9.

Based on the estimated 9-equation econometric model, we calculated two sets of predicted healthcare utilization: one for the factual case and one for a counterfactual case. In the factual case, the set of predicted utilization was calculated for smokers. In the counterfactual case, the set of predicted expenditures was calculated for “hypothetical never-smoking smokers”, who are identical to smokers in every way except that they are assumed to be never smokers.<sup>4,6,7</sup> The difference between the factual and the counterfactual predictions is the excess utilization attributed to cigarette smoking. The ratio of the excess utilization to the sum of predicted values for all individuals (including smokers and never smokers) from the factual case is the smoking-attributable fraction

(SAF) of health utilization. The ratio of the mean predicted utilization for smokers (or ‘hypothetical never-smoking smokers’) to the mean predicted expenditures for never smokers is the relative risk (RR) of healthcare utilization for smokers (or ‘hypothetical never-smoking smokers’).

The SAF indicates the proportion of healthcare utilization that could be attributed to smoking. In this study, there are 3 categories of smokers: 1) current smokers, 2) former smokers who quit <15 years ago, and 3) former smokers who quit 15+ years ago. Following the previous studies,<sup>4,5</sup> the SAF of healthcare utilization for category  $i$  smokers can be expressed as a function of smoking prevalence and RRs as shown in the formula below.

$$SAF_i = \frac{P_i * (RR_i - RR_{i \rightarrow n})}{P_n + P_1 * (RR_1) + P_2 * (RR_2) + P_3 * (RR_3)} \quad \text{(Equation 10)}$$

where:

$P_n$  = prevalence of never smokers;

$P_i$  = prevalence of category  $i$  smokers;

$P_1, P_2, P_3$  = prevalence of current smokers, prevalence of former smokers who quit <15 years ago, prevalence of former smokers who quit 15+ years ago;

$RR_i$  = relative risk of healthcare utilization type for category  $i$  smokers;

$RR_{i \rightarrow n}$  = relative risk of healthcare utilization for ‘hypothetical never-smoking smoker’ category  $i$  smokers.

## eReferences

1. Miller LS, Zhang X, Novotny T, Rice DP, Max W. State estimates of Medicaid expenditures attributable to cigarette smoking, fiscal year 1993. *Public health reports*. 1998;113(2):140.
2. Max W, Rice D, Sung H, Zhang X, Miller L. The economic burden of smoking in California. *Tobacco Control*. 2004;13(3):264-267.
3. Max W, Sung HY, Tucker LY, Stark B. The disproportionate cost of smoking for African Americans in California. *Am J Public Health*. 2010;100(1):152-158.
4. Max W, Sung HY, Lightwood J. The impact of changes in tobacco control funding on healthcare expenditures in California, 2012-2016. *Tob Control*. 2013;22(e1):e10-15.
5. Max W, Sung HY, Shi Y, Stark B. *The Cost of Smoking in California, 2009*. San Francisco, CA: Institute for Health & Aging, University of California, San Francisco. 2014.  
<https://trdrp.org/files/cost-smoking-ca-final-report.pdf> (Accessed July 15, 2023)
6. Max W, Sung HY, Shi Y, Stark B. The Cost of Smoking in California. *Nicotine Tob Res*. 2016;18(5):1222-1229.
7. Wang Y, Sung HY, Lightwood J, Yao T, Max WB. Healthcare utilisation and expenditures attributable to current e-cigarette use among US adults. *Tob Control*. 2022.

**eTable 1. Number and Percentage of US Adults (Aged 35+ Years) Identified to Have Chronic Lower Respiratory Disease (CLRD) in 2020 and Their Health Care Expenditures in 2020 by Type of Services and Age Group**

| Variable                                                                                         | Age 35-64        |                  |              | Age 65+          |                  |               | Adults with CLRD, both age groups |
|--------------------------------------------------------------------------------------------------|------------------|------------------|--------------|------------------|------------------|---------------|-----------------------------------|
|                                                                                                  | All adults       | Adults with CLRD |              | All adults       | Adults with CLRD |               |                                   |
|                                                                                                  | Number or amount | Number or amount | Row %        | Number or amount | Number or amount | Row %         | Number or amount                  |
| <b>Number of persons<sup>a</sup></b>                                                             | 123,811,537      | 11,211,222       | 9.1%         | 58,265,600       | 7,561,909        | 13.0%         | 18,773,131                        |
| <b>Amount of annual healthcare expenditures<sup>a</sup> by type of services (in billion \$):</b> |                  |                  |              |                  |                  |               |                                   |
| Inpatient care                                                                                   | \$190.99         | \$38.23          | 20.0%        | \$168.10         | \$30.92          | 18.4%         | \$69.15                           |
| ED visits                                                                                        | \$29.45          | \$6.38           | 21.7%        | \$14.06          | \$2.34           | 16.6%         | \$8.72                            |
| Physician visits                                                                                 | \$356.84         | \$60.09          | 16.9%        | \$243.91         | \$40.16          | 16.5%         | \$100.25                          |
| Home health visits                                                                               | \$29.43          | \$6.83           | 23.2%        | \$71.82          | \$17.24          | 24.0%         | \$24.09                           |
| <b>All four types</b>                                                                            | <b>\$606.71</b>  | <b>\$111.52</b>  | <b>18.4%</b> | <b>\$497.89</b>  | <b>\$90.67</b>   | <b>18.21%</b> | <b>\$202.19</b>                   |

Notes: ED = Emergency department. All the numbers are estimated from the weighted analysis.

<sup>a</sup>Estimated using data from the 2020 Medical Expenditure Panel Survey.

**eTable 2. Estimated Coefficients of the Econometric Models for the Impact of Cigarette Smoking on Health Care Utilization Among US Adults Aged 35+ Years With Chronic Lower Respiratory Disease: National Health Interview Survey, 2014-2018 (N=13,017)**

| Independent variables in the model by age group | Ordered Probit model <sup>a</sup> on health status | Two-part model <sup>b</sup> on hospital nights |                                         | Two-part model <sup>b</sup> on ED visits |                                         | Two-part model <sup>b</sup> on physician visits |                                         | Two-part model <sup>b</sup> on home health visits |                                         |
|-------------------------------------------------|----------------------------------------------------|------------------------------------------------|-----------------------------------------|------------------------------------------|-----------------------------------------|-------------------------------------------------|-----------------------------------------|---------------------------------------------------|-----------------------------------------|
|                                                 |                                                    | 1 <sup>st</sup> part (Probit model)            | 2 <sup>nd</sup> part (log-linear model) | 1 <sup>st</sup> part (Probit model)      | 2 <sup>nd</sup> part (log-linear model) | 1 <sup>st</sup> part (Probit model)             | 2 <sup>nd</sup> part (log-linear model) | 1 <sup>st</sup> part (Probit model)               | 2 <sup>nd</sup> part (log-linear model) |
| <b>Age 35-64:</b>                               |                                                    |                                                |                                         |                                          |                                         |                                                 |                                         |                                                   |                                         |
| Sample size                                     | 7,400                                              | 7,400                                          | 1,395                                   | 7,400                                    | 2,991                                   | 7,400                                           | 2,816                                   | 7,400                                             | 259                                     |
| Current smoker                                  | 0.542 <sup>***</sup>                               | -0.065                                         | -0.188 <sup>*</sup>                     | 0.078 <sup>*</sup>                       | -0.053                                  | -0.145                                          | -0.087 <sup>***</sup>                   | -0.292 <sup>**</sup>                              | -0.257                                  |
| <15-year quitters                               | 0.327 <sup>***</sup>                               | 0.115 <sup>*</sup>                             | 0.122                                   | 0.063                                    | -0.044                                  | 0.059                                           | -0.103 <sup>***</sup>                   | -0.011                                            | -0.151                                  |
| 15+year quitters                                | 0.099 <sup>*</sup>                                 | -0.001                                         | -0.074                                  | 0.019                                    | -0.014                                  | -0.011                                          | -0.025                                  | -0.154                                            | -0.372                                  |
| Never smoker (Reference)                        |                                                    |                                                |                                         |                                          |                                         |                                                 |                                         |                                                   |                                         |
| Predicted health status                         | N/A                                                | 0.317 <sup>***</sup>                           | 0.273 <sup>***</sup>                    | 0.239 <sup>***</sup>                     | 0.127 <sup>***</sup>                    | 0.188 <sup>***</sup>                            | 0.103 <sup>***</sup>                    | 0.397 <sup>***</sup>                              | 0.014                                   |
| <b>Age 65+:</b>                                 |                                                    |                                                |                                         |                                          |                                         |                                                 |                                         |                                                   |                                         |
| Sample size                                     | 5,617                                              | 5,617                                          | 1,484                                   | 5,617                                    | 2,140                                   | 5,617                                           | 2,429                                   | 5,617                                             | 466                                     |
| Current smoker                                  | 0.247 <sup>***</sup>                               | -0.069                                         | -0.054                                  | -.0157 <sup>**</sup>                     | -0.093 <sup>*</sup>                     | -0.082                                          | -0.044                                  | 0.175                                             | 0.603 <sup>***</sup>                    |
| <15-year quitters                               | 0.239 <sup>***</sup>                               | 0.205 <sup>***</sup>                           | 0.168 <sup>*</sup>                      | 0.069                                    | -0.134 <sup>***</sup>                   | -0.003                                          | -0.021                                  | 0.269 <sup>**</sup>                               | 0.417 <sup>**</sup>                     |
| 15+year quitters                                | -0.076 <sup>*</sup>                                | -0.011                                         | 0.019                                   | 0.033                                    | -0.058                                  | 0.210 <sup>***</sup>                            | 0.004                                   | 0.022                                             | -0.081                                  |
| Never smoker (Reference)                        |                                                    |                                                |                                         |                                          |                                         |                                                 |                                         |                                                   |                                         |
| Predicted health status                         | N/A                                                | 0.311 <sup>***</sup>                           | 0.263 <sup>***</sup>                    | 0.297 <sup>***</sup>                     | 0.159 <sup>***</sup>                    | 0.217 <sup>***</sup>                            | 0.075 <sup>***</sup>                    | 0.392 <sup>***</sup>                              | 0.132 <sup>**</sup>                     |

**Notes.** ED=Emergency department. <sup>\*\*\*</sup> Significant at two-tailed  $p < .001$ ; <sup>\*\*</sup> Significant at two-tailed  $p < .01$ ; <sup>\*</sup> Significant at two-tailed  $p < .05$ . The statistical significance for the estimated coefficient was determined by chi-square test for the ordered Probit models and Probit models, and t-test for the log-linear models.

<sup>a</sup>In addition to smoking status, the model also controlled for gender, age, race/ethnicity, education, marital status, region of residence, body weight status, and binge drinking status.

<sup>b</sup>In addition to smoking status and predicted health status, the model also controlled for gender, age, race/ethnicity, education, marital status, region of residence, body weight status, binge drinking status, poverty status, and health insurance coverage status. The first part of the two-part model was estimated as a probit regression, and the second part of the two-part model was estimated as a log-linear regression.

**eTable 3. Number of Smokers Among US adults (Aged 35+ Years) With Chronic Lower Respiratory Disease (CLRD) in 2020 by Age Group**

| Cigarette smoking status | Number of smokers <sup>a</sup> |                  |
|--------------------------|--------------------------------|------------------|
|                          | Age 35-64                      | Age 65+          |
| <b>Current smokers</b>   | <b>3,508,504</b>               | <b>1,451,033</b> |
| <b>Former smokers</b>    | <b>3,496,790</b>               | <b>4,104,904</b> |
| < 15-year quitters       | 2,254,447                      | 1,684,758        |
| 15+ year quitters        | 1,242,343                      | 2,420,146        |
| <b>Never smokers</b>     | <b>4,205,928</b>               | <b>2,005,972</b> |

Notes: All the numbers are estimated from the weighted analysis.

<sup>a</sup>Calculated by multiplying the 2020 smoking prevalence rates (shown in Table 3) by the population size for adults with CLRD in 2020 (shown in eTable 1).



**eTable 4. Sensitivity Analysis Which Allows for the Negative SAF Values<sup>a</sup>: Annual Cigarette Smoking-Attributable Healthcare Expenditures (SAHEs) in 2020 by Type of Health Services, Smoking Status, and Age Group for US Adults Aged 35+ Years With Chronic Lower Respiratory Disease (CLRD)**

| Subgroups               | SAHE <sup>c</sup> by type of health services<br>(\$ <sup>b</sup> , million) |                             |                                |                                | Total SAHE<br>(\$ <sup>b</sup> , billion) | Per-smoker<br>SAHE <sup>d</sup><br>(\$ <sup>b</sup> ) |
|-------------------------|-----------------------------------------------------------------------------|-----------------------------|--------------------------------|--------------------------------|-------------------------------------------|-------------------------------------------------------|
|                         | Inpatient care                                                              | ED visits                   | Physician visits               | Home health visits             |                                           |                                                       |
| <b>Age 35-64 group:</b> |                                                                             |                             |                                |                                |                                           |                                                       |
| <b>Current smokers</b>  | <b>5,240</b>                                                                | <b>419</b>                  | <b>2,936</b>                   | <b>1,062</b>                   | <b>9.7</b>                                | <b>2,752</b>                                          |
| <b>Former smokers</b>   | <b>2,017</b>                                                                | <b>166</b>                  | <b>1,318</b>                   | <b>400</b>                     | <b>3.9</b>                                | <b>1,083</b>                                          |
| <15-year quitters       | 1,765                                                                       | 146                         | 1,131                          | 346                            | 3.4                                       | 1,502                                                 |
| 15+ year quitters       | 252                                                                         | 20                          | 187                            | 54                             | 0.5                                       | 412                                                   |
| <b>All smokers</b>      | <b>7,257</b><br><b>(53.5%)</b>                                              | <b>585</b><br><b>(4.3%)</b> | <b>4,254</b><br><b>(31.4%)</b> | <b>1,462</b><br><b>(10.8%)</b> | <b>13.6</b><br><b>(100.0%)</b>            | <b>2,010</b>                                          |
| <b>Age 65+ group:</b>   |                                                                             |                             |                                |                                |                                           |                                                       |
| <b>Current smokers</b>  | <b>1,211</b>                                                                | <b>63</b>                   | <b>636</b>                     | <b>563</b>                     | <b>2.5</b>                                | <b>1,704</b>                                          |
| <b>Former smokers</b>   | <b>688</b>                                                                  | <b>38</b>                   | <b>389</b>                     | <b>305</b>                     | <b>1.4</b>                                | <b>346</b>                                            |
| <15-year quitters       | 1,290                                                                       | 69                          | 715                            | 726                            | 2.8                                       | 1,662                                                 |
| 15+ year quitters       | -602                                                                        | -31                         | -327                           | -420                           | -1.4                                      | -570                                                  |
| <b>All smokers</b>      | <b>1,899</b><br><b>(47.5%)</b>                                              | <b>102</b><br><b>(2.6%)</b> | <b>1,024</b><br><b>(25.5%)</b> | <b>868</b><br><b>(24.4%)</b>   | <b>3.9</b><br><b>(100.0%)</b>             | <b>701</b>                                            |

Notes. ED = Emergency department; SAF = smoking-attributable fraction. The number in parentheses denotes percent distribution.

<sup>a</sup>Based on the negative values originally estimated from the econometric model: -1.9%, -1.3%, -0.8%, and -2.4% for inpatient care, ED visits, physician visits, and home health visits.

<sup>b</sup>In 2020 dollar.

<sup>c</sup>Derived by multiplying the SAF values (shown in Table 4) by annual healthcare expenditures among adults with CLRD (shown in eTable 1 in Supplement 1) for each type of health services and age group.

<sup>d</sup>Derived by dividing total SAHE by the number of smokers with CLRD for each smoking status category (shown in eTable 3 in Supplement 1).
