# Supplementary material for: Smoking-Attributable Health Care Expenditures for US Adults With Chronic Lower Respiratory Disease
Source: PubMed Central journal article supplement (PMC11140527; doi:10.1001/jamanetworkopen.2024.13869), 2024-05-30
Supplement: jamanetwopen-e2413869-s002.pdf [file jamanetwopen-e2413869-s002.pdf]

## Data Sharing Statement

Gu. Smoking-Attributable Health Care Expenditures for US Adults With Chronic Lower Respiratory Disease. *JAMA Netw Open*. Published May 30, 2024.

doi:10.1001/jamanetworkopen.2024.13869

### Data

**Data available:** No

### Additional Information

**Explanation for why data not available:** Data for this study are available from pub-use files of National Health Interview Surveys and Medical Expenditure Panel Survey.
